# Supplementary material for: A Mitochondrial Genome Phylogeny of Cleridae (Coleoptera, Cleroidea)
Source: MDPI journal article supplement (doi:10.3390/insects13020118), 2022-01-24
Supplement: s1 [file s1]

**Table S1:** Best models calculated by BI of four mitochondrial datasets

| <b>PCGRNAdataset</b>   |            |                                           |
|------------------------|------------|-------------------------------------------|
| Partitions             | Best Model | Partition names                           |
| P1                     | HKY+G      | trnL2,trnC                                |
| P2                     | GTR+I+G    | trnS2, trnF,trnY,trnP                     |
| P3                     | GTR+G      | trnR,rrnL                                 |
| P4                     | GTR+I+G    | trnH, rrnS                                |
| P5                     | GTR+I+G    | trnE,trnS1,trnT,trnA,trnD, trnG,trnN      |
| P6                     | GTR+G      | trnI,cox2_pos1,                           |
| P7                     | GTR+I+G    | atp8_pos2,trnM,trnK                       |
| P8                     | GTR+I+G    | trnL2, nad5_pos2                          |
| P9                     | HKY+G      | trnQ                                      |
| P10                    | F81+I      | trnV                                      |
| P11                    | HKY+I+G    | trnW                                      |
| P12                    | GTR+I+G    | atp6_pos1, cytb_pos1, cox3_pos1           |
| P13                    | GTR+I      | atp6_pos2,nad1_pos2,                      |
| P14                    | HKY+I+G    | cox3_pos3,atp6_pos3,nad3_pos3             |
| P15                    | HKY+G      | atp8_pos1                                 |
| P16                    | HKY+I+G    | nad2_pos3, atp8_pos3                      |
| P17                    | GTR+I      | cox1_pos1                                 |
| P18                    | F81+I+G    | cox1_pos2                                 |
| P19                    | GTR+G      | cox1_pos3                                 |
| P20                    | GTR+I+G    | cox3_pos2,cox2_pos2, cytb_pos2            |
| P21                    | HKY+I+G    | cox2_pos3                                 |
| P22                    | HKY+G      | cytb_pos3                                 |
| P23                    | GTR+I+G    | nad1_pos1                                 |
| P24                    | HKY+G      | nad1_pos3                                 |
| P25                    | GTR+I+G    | nad6_pos1,nad2_pos1,nad3_pos1             |
| P26                    | GTR+I+G    | nad3_pos2,nad6_pos2,nad2_pos2             |
| P27                    | GTR+I+G    | nad5_pos1,nad4L_pos1,nad4_pos1            |
| P28                    | GTR+I+G    | nad4L_pos2,nad4_pos2,                     |
| P29                    | HKY+G      | nad4L_pos3                                |
| P30                    | GTR+G      | nad5_pos3,nad4_pos3                       |
| P31                    | HKY+G      | nad6_pos3                                 |
| <b>PCGrRNA dataset</b> |            |                                           |
| Partitions             | Best Model | Partition names                           |
| P1                     | GTR+G      | rrnL                                      |
| P2                     | GTR+I+G    | rrns                                      |
| P3                     | GIR+G      | cox2_pos1                                 |
| P4                     | GTR+I+G    | cox3_pos2,cytb_pos2, cox2_pos2            |
| P5                     | HKY+I+G    | cox2_pos3                                 |
| P6                     | GTR+I+G    | atp6_pos1,cytb_pos1, cox3_pos1            |
| P7                     | HKY+I+G    | nad3_pos3,cox3_pos3, atp6_pos3            |
| P8                     | HKY+G      | cytb_pos3                                 |
| P9                     | GTR+I+G    | nad1_pos1                                 |
| P10                    | GTR+I      | nad1_pos2, atp6_pos2                      |
| P11                    | HKY+G      | nad1_pos3                                 |
| P12                    | GTR+I+G    | atp8_pos1,nad3_pos1, nad6_pos1, nad2_pos1 |
| P13                    | GTR+I+G    | nad3_pos2, nad6_pos2, nad2_pos2           |

| P14                  | HKY+I+G    | nad2_pos3, atp8_pos3                        |
|----------------------|------------|---------------------------------------------|
| P15                  | GTR+I+G    | nad5_pos1, nad4_pos1, nad4L_pos1            |
| P16                  | GTR+I+G    | nad4L_pos2, nad4_pos2                       |
| P17                  | HKY+I+G    | nad4L_pos3                                  |
| P18                  | GTR+I+G    | nad5_pos3, nad4_pos3                        |
| P19                  | GTR+I+G    | nad5_pos2                                   |
| P20                  | HKY+G      | nad6_pos3                                   |
| P21                  | GTR+I+G    | atp8_pos2                                   |
| P22                  | GTR+G      | cox1_pos1                                   |
| P23                  | GTR        | cox1_pos2                                   |
| P24                  | GTR+G      | cox1_pos3                                   |
| <b>PCG dataset</b>   |            |                                             |
| Partitions           | Best Model | Partition names                             |
| P1                   | GTR+I+G    | atp6_pos1, cytb_pos1, cox3_pos1             |
| P2                   | GTR+I+G    | atp6_pos2, nad1_pos2                        |
| P3                   | HKY+I+G    | cox2_pos3, nad3_pos3, cox3_pos3, atp6_pos3  |
| P4                   | HKY+G      | atp8_pos1                                   |
| P5                   | GTR+G      | atp8_pos2                                   |
| P6                   | HKY+I+G    | nad2_pos3, atp8_pos3                        |
| P7                   | GTR+I      | cox1_pos1                                   |
| P8                   | F81+I+G    | cox1_pos2                                   |
| P9                   | GTR+G      | cox1_pos3                                   |
| P10                  | GTR+G      | cox2_pos1                                   |
| P11                  | GTR+I+G    | cox3_pos2, cox2_pos2, cytb_pos2             |
| P12                  | GTR+G      | cytb_pos3                                   |
| P13                  | GTR+I+G    | nad1_pos1                                   |
| P14                  | HKY+G      | nad1_pos3                                   |
| P15                  | GTR+I+G    | nad6_pos1, nad3_pos1, nad2_pos1             |
| P16                  | GTR+I+G    | nad3_pos2, nad2_pos2, nad6_pos2             |
| P17                  | GTR+I+G    | nad5_pos1, nad4L_pos1, nad4_pos1            |
| P18                  | GTR+I+G    | nad5_pos2, nad4L_pos2, nad4_pos2            |
| P19                  | HKY+G      | nad4L_pos3                                  |
| P20                  | GTR+G      | nad5_pos3, nad4_pos3                        |
| P21                  | GTR+G      | nad6_pos3                                   |
| <b>PCG12 dataset</b> |            |                                             |
| Partitions           | Best Model | Partition names                             |
| P1                   | GTR+I+G    | atp6_pos1, atp8_pos2, cox3_pos1, cob_pos1   |
| P2                   | GTR+I      | atp6_pos2, cox1_pos2                        |
| P3                   | GTR+I+G    | nad6_pos1, atp8_pos1, nad2_pos1, nad3_pos1, |
| P4                   | GTR+I      | cox1_pos1                                   |
| P5                   | GTR+G      | cox2_pos1                                   |
| P6                   | GTR+I+G    | cob_pos2, cox2_pos2, cox3_pos2              |
| P7                   | GTR+I+G    | nad1_pos1, nad4_pos1, ad4l_pos1, nad5_pos1, |
| P8                   | GTR+I+G    | nad1_pos2, nad4_pos2, ad4l_pos2, nad5_pos2, |
| P9                   | GTR+I+G    | nad6_pos2, nad2_pos2, nad3_pos2             |

**Table S2:** Best models calculated by IQ of four mitochondrial datasets

| <b>PCGRNAdataset</b>  |              |                                            |
|-----------------------|--------------|--------------------------------------------|
| Partitions            | Best Model   | Partition names                            |
| P1                    | HKY+F+G4     | trnL2, trnC                                |
| P2                    | TIM+F+G4     | trnS2, trnF, trnY, trnP                    |
| P3                    | GTR+F+G4     | trnR, rrnL                                 |
| P4                    | GTR+F+I+G4   | trnH, rrnS                                 |
| P5                    | TPM2u+F+I+G4 | trnE, trnS1, trnT, trnA, trnD, trnG, trnN  |
| P6                    | TIM3+F+G4    | trnI, cox2_pos1,                           |
| P7                    | TPM2+F+G4    | atp8_pos2, trnM, trnK                      |
| P8                    | GTR+F+G4     | trnL2, nad5_pos2                           |
| P9                    | HKY+F+G4     | trnQ                                       |
| P10                   | F81+F+I      | trnV                                       |
| P11                   | TIM3e+G4     | trnW                                       |
| P12                   | GTR+F+G4     | atp6_pos1, cytb_pos1, cox3_pos1            |
| P13                   | TIM+F+I      | atp6_pos2, nad1_pos2,                      |
| P14                   | HKY+F+I+G4   | cox3_pos3, atp6_pos3, nad3_pos3            |
| P15                   | HKY+F+G4     | atp8_pos1                                  |
| P16                   | HKY+F+I+G4   | nad2_pos3, atp8_pos3                       |
| P17                   | TIM2+F+I     | cox1_pos1                                  |
| P18                   | F81+F+I      | cox1_pos2                                  |
| P19                   | HKY+F+G4     | cox1_pos3                                  |
| P20                   | TIM+F+I+G4   | cox3_pos2, cox2_pos2, cytb_pos2            |
| P21                   | HKY+F+I+G4   | cox2_pos3                                  |
| P22                   | HKY+F+G4     | cytb_pos3                                  |
| P23                   | TPM2u+F+I+G4 | nad1_pos1                                  |
| P24                   | HKY+F+G4     | nad1_pos3                                  |
| P25                   | GTR+F+I+G4   | nad6_pos1, nad2_pos1, nad3_pos1            |
| P26                   | TVM+F+I+G4   | nad3_pos2, nad6_pos2, nad2_pos2            |
| P27                   | GTR+F+I+G4   | nad5_pos1, nad4L_pos1, nad4_pos1           |
| P28                   | TIM+F+G4     | nad4L_pos2, nad4_pos2,                     |
| P29                   | HKY+F+G4     | nad4L_pos3                                 |
| P30                   | TPM2u+F+G4   | nad5_pos3, nad4_pos3                       |
| P31                   | TN+F+G4      | nad6_pos3                                  |
| <b>PCGrRNAdataset</b> |              |                                            |
| Partitions            | Best Model   | Partition names                            |
| P1                    | GTR+F+G4     | rrnL                                       |
| P2                    | GTR+F+G4     | rrns                                       |
| P3                    | TIM3+F+G4    | cox2_pos1                                  |
| P4                    | TIM+F+I+G4   | cox3_pos2, cytb_pos2, cox2_pos2            |
| P5                    | HKY+F+I+G4   | cox2_pos3                                  |
| P6                    | GTR+F+G4     | atp6_pos1, cytb_pos1, cox3_pos1            |
| P7                    | HKY+F+I+G4   | nad3_pos3, cox3_pos3, atp6_pos3            |
| P8                    | HKY+F+G4     | cytb_pos3                                  |
| P9                    | TPM2u+F+I+G4 | nad1_pos1                                  |
| P10                   | TIM+F+I      | nad1_pos2, atp6_pos2                       |
| P11                   | HKY+F+G4     | nad1_pos3                                  |
| P12                   | GTR+F+I+G4   | atp8_pos1, nad3_pos1, nad6_pos1, nad2_pos1 |
| P13                   | TVM+F+G4     | nad3_pos2, nad6_pos2, nad2_pos2            |

| P14                  | HKY+F+I+G4   | nad2_pos3, atp8_pos3                       |
|----------------------|--------------|--------------------------------------------|
| P15                  | GTR+F+I+G4   | nad5_pos1, nad4_pos1, nad4L_pos1           |
| P16                  | TIM+F+G4     | nad4L_pos2, nad4_pos2                      |
| P17                  | HKY+F+G4     | nad4L_pos3                                 |
| P18                  | TPM2u+F+G4   | nad5_pos3, nad4_pos3                       |
| P19                  | GTR+F+G4     | nad5_pos2                                  |
| P20                  | TN+F+G4      | nad6_pos3                                  |
| P21                  | TPM3u+F+G4   | atp8_pos2                                  |
| P22                  | TIM2+F+G4    | cox1_pos1                                  |
| P23                  | TIM2+F+G4    | cox1_pos2                                  |
| P24                  | TPM2+F+G4    | cox1_pos3                                  |
| <b>PCG dataset</b>   |              |                                            |
| Partitions           | Best Model   | Partition names                            |
| P1                   | GTR+F+G4     | atp6_pos1, cytb_pos1, cox3_pos1            |
| P2                   | K3Pu+F+I     | atp6_pos2, nad1_pos2                       |
| P3                   | HKY+F+I+G4   | cox2_pos3, nad3_pos3, cox3_pos3, atp6_pos3 |
| P4                   | HKY+F+G4     | atp8_pos1                                  |
| P5                   | TPM3u+F+G4   | atp8_pos2                                  |
| P6                   | HKY+F+I+G4   | nad2_pos3, atp8_pos3                       |
| P7                   | TIM2+F+I     | cox1_pos1                                  |
| P8                   | F81+F+I      | cox1_pos2                                  |
| P9                   | HKY+F+G4     | cox1_pos3                                  |
| P10                  | TIM3+F+G4    | cox2_pos1                                  |
| P11                  | TIM+F+I+G4   | cox3_pos2, cox2_pos2, cytb_pos2            |
| P12                  | HKY+F+G4     | cytb_pos3                                  |
| P13                  | TPM2u+F+I+G4 | nad1_pos1                                  |
| P14                  | HKY+F+G4     | nad1_pos3                                  |
| P15                  | GTR+F+I+G4   | nad6_pos1, nad3_pos1, nad2_pos1            |
| P16                  | TVM+F+G4     | nad3_pos2, nad2_pos2, nad6_pos2            |
| P17                  | GTR+F+I+G4   | nad5_pos1, nad4L_pos1, nad4_pos1           |
| P18                  | GTR+F+G4     | nad5_pos2, nad4L_pos2, nad4_pos2           |
| P19                  | HKY+F+G4     | nad4L_pos3                                 |
| P20                  | TPM2u+F+G4   | nad5_pos3, nad4_pos3                       |
| P21                  | TN+F+G4      | nad6_pos3                                  |
| <b>PCG12 dataset</b> |              |                                            |
| Partitions           | Best Model   | Partition names                            |
| P1                   | TIM2+F+I+G4  | cox3_pos1, cob_pos1, atp8_pos2, atp6_pos1  |
| P2                   | F81+F+I      | atp6_pos2, cox1_pos2                       |
| P3                   | TIM2+F+I+G4  | nad2_pos1, nad3_pos1, nad6_pos1, atp8_pos1 |
| P4                   | TIM2+F+I     | cox1_pos1                                  |
| P5                   | TIM3+F+G4    | cox2_pos1                                  |
| P6                   | K3Pu+F+I+G4  | cob_pos2, cox2_pos2, cox3_pos2             |
| P7                   | GTR+F+I+G4   | nad1_pos1, nad5_pos1, nad4_pos1, ad4l_pos1 |
| P8                   | GTR+F+I+G4   | nad4_pos2, nad1_pos2, nad5_pos2, ad4l_pos2 |
| P9                   | TVM+F+I+G4   | nad6_pos2, nad2_pos2, nad3_pos2            |

**Table S3:** The length and A+T% of different components of mitogenomes in Cleridae

| species                           | Full   |      | PCGs   |      | tRNA   |       | rRNA   |      | CR     |      | codon position of PCG |       |       |
|-----------------------------------|--------|------|--------|------|--------|-------|--------|------|--------|------|-----------------------|-------|-------|
|                                   | length | AT%  | length | AT%  | length | AT%   | length | AT%  | length | AT%  | 1                     | 2     | 3     |
| <i>Clerus</i> sp.                 | >12578 | 78.3 | 11,129 | 78.0 | >1272  | 81.2  | >145   | 75.2 | ?      | ?    | 72.3                  | 68.81 | 92.78 |
| <i>Clerus dealbatus</i>           | 16,003 | 79.1 | 11,117 | 77.7 | 1,487  | 80.4  | 2,064  | 81.4 | 1,284  | 90.3 | 72.41                 | 69.08 | 89.97 |
| <i>Xenorthrius discoidalis</i>    | 16,153 | 80   | 11,077 | 78.4 | 1,448  | 80.1  | 2,077  | 82.2 | 1,413  | 89.5 | 72.28                 | 68.22 | 93.78 |
| <i>Opilo grahami</i>              | 16,209 | 80   | 11,118 | 78.4 | 1,447  | 80.1  | 2,076  | 82.1 | 1,470  | 89.2 | 72.4                  | 69    | 93.75 |
| <i>Clerus klapperichi</i>         | >14691 | 77.7 | 11,104 | 77.1 | 1,458  | 80.4  | >1778  | 80.1 | ?      | ?    | 72.42                 | 69.11 | 89.46 |
| <i>Omadius</i> sp.                | >13417 | 76.1 | 10,182 | 74.4 | >1,051 | 82.40 | 2,073  | 81.7 | >161   | ?    | 69.39                 | 71.45 | 81.24 |
| <i>Trichod</i> sp.                | 16,572 | 78.6 | 11,094 | 76.7 | 1,455  | 80.6  | 2,074  | 81.8 | 1,670  | 85.6 | 71.44                 | 69.41 | 89.15 |
| <i>Pieleus irregularis</i>        | 17,127 | 77.7 | 11,059 | 75.1 | 1,442  | 79.6  | 2,086  | 81.4 | 2,401  | 85.4 | 70.3                  | 68.64 | 86.04 |
| <i>Callimerus chinensis</i>       | 16,354 | 78.9 | 11,123 | 77.2 | 1,462  | 80.1  | 2,070  | 82   | 1,635  | 86.5 | 71.75                 | 68.4  | 91.13 |
| <i>Callimerus inbasalis</i>       | >15539 | 78.5 | 11,093 | 77.4 | 1,460  | 80.4  | 2,071  | 81.6 | >126   | 70.8 | 71.92                 | 68.8  | 91.26 |
| <i>Callimerus</i> sp.             | 16,920 | 79.1 | 11,138 | 77.8 | 1,471  | 79.7  | 2,074  | 81.5 | 1,598  | 84.8 | 71.77                 | 68.39 | 93.09 |
| <i>Neohydnius sinensis</i>        | 16,533 | 79.5 | 11,128 | 77.4 | 1,451  | 80.9  | 2,080  | 82.8 | 1,700  | 88.2 | 72.19                 | 69.03 | 90.61 |
| <i>Callimerus nigroapicalis</i>   | >19746 | 77.7 | 11,093 | 76.3 | >1387  | 79.2  | >352   | 73.9 | ?      | ?    | 71.7                  | 68.39 | 88.42 |
| <i>Neohydnius jiuzhaigouensis</i> | 16,305 | 79.5 | 11,134 | 77.6 | 1,457  | 80.3  | 2,082  | 83.4 | 1,531  | 87.9 | 71.73                 | 68.9  | 91.32 |
| <i>Tenerus flavicollis</i>        | 15,638 | 78   | 11,142 | 76.3 | 1,439  | 79.0  | 2,068  | 81.9 | 987    | 88.3 | 70.75                 | 68.19 | 89.77 |
| <i>Tenerus hilleri</i>            | 15,657 | 77.1 | 11,140 | 75.5 | 1,444  | 78.7  | 2,066  | 81.2 | 1,001  | 84.5 | 69.97                 | 68.27 | 88.12 |
| <i>Tillus nitidus</i>             | >16645 | 78.9 | 11,135 | 76.5 | 1,430  | 79.4  | 2,068  | 82.6 | >466   | 86.7 | 71.85                 | 68.66 | 88.92 |
| <i>Cladiscus yunnanus</i>         | 16,029 | 78.7 | 11,127 | 77.3 | 1,434  | 79.4  | 2,070  | 81.7 | 1,382  | 85.9 | 71.28                 | 68.74 | 91.67 |

Notes. ? indicates that it is uncertain due to the incompleteness.

**Table S4:** A+T% of each PCG of mitogenomes in Cleridae

| species/genes                     | <i>atp6</i> | <i>atp8</i> | <i>cox1</i> | <i>cox2</i> | <i>cox3</i> | <i>cytb</i> | <i>nad1</i> | <i>nad2</i> | <i>nad3</i> | <i>nad4</i> | <i>nad4L</i> | <i>nad5</i> | <i>nad6</i> |
|-----------------------------------|-------------|-------------|-------------|-------------|-------------|-------------|-------------|-------------|-------------|-------------|--------------|-------------|-------------|
| <i>Clerus</i> sp.                 | 77.8        | 87.2        | 70.1        | 75.5        | 72.6        | 74.3        | 78.8        | 83.3        | 80.8        | 80.2        | 83.4         | 81.6        | 85.1        |
| <i>Clerus dealbatus</i>           | 77.4        | 83.3        | 69.2        | 76          | 71.2        | 73.6        | 76.8        | 82.7        | 83          | 80.3        | 79.5         | 80.3        | 84.6        |
| <i>Xenorthrius discoidalis</i>    | 77.5        | 87.8        | 70.2        | 75.9        | 74.8        | 75.4        | 78.5        | 82.2        | 79.9        | 81.6        | 83.2         | 81.7        | 85.9        |
| <i>Opilo grahami</i>              | 77.5        | 87.8        | 70.5        | 75.9        | 74.8        | 75.4        | 78.5        | 82.2        | 79.9        | 81.6        | 83.2         | 81.8        | 85.9        |
| <i>Clerus klapperichi</i>         | 77          | 83.3        | 69.2        | 75.1        | 71.6        | 73.5        | 76.8        | 82.2        | 82.7        | 80.2        | 79.3         | 80          | 85.1        |
| <i>Omadius</i> sp.                | 73.6        | 80.8        | 66.4        | 71.5        | 71.9        | 70.4        | 77.4        |             | 74.6        | 76.2        | 81.4         | 78.4        | 84.5        |
| <i>Trichod</i> sp.                | 75.7        | 87.8        | 69.3        | 72.3        | 72.9        | 72.4        | 78          | 82          | 77.7        | 78.4        | 81.1         | 80.4        | 85.1        |
| <i>Pieleus irregularis</i>        | 72.9        | 83.3        | 66.2        | 72.4        | 69.5        | 71.8        | 74.6        | 81.6        | 79.8        | 78.1        | 81.5         | 78.1        | 83.1        |
| <i>Callimerus chinensis</i>       | 76.3        | 84.6        | 67.2        | 74.4        | 73          | 74.1        | 77.7        | 80.8        | 81.5        | 82.3        | 81.4         | 80.3        | 85.1        |
| <i>Callimerus inbasalis</i>       | 75.5        | 87.1        | 67.5        | 75.6        | 72.7        | 74.2        | 78.8        | 81          | 79          | 81.5        | 82.8         | 80.9        | 86.1        |
| <i>Callimerus</i> sp.             | 76.8        | 84.6        | 69          | 75.5        | 72.9        | 74.8        | 78.4        | 81.4        | 83          | 82          | 82.8         | 80.7        | 85.9        |
| <i>Neohydnius sinensis</i>        | 76.2        | 83.9        | 69.4        | 74.6        | 72.7        | 74.6        | 77.7        | 81.3        | 78.7        | 80.9        | 82.5         | 80.4        | 85.9        |
| <i>Callimerus nigroapicalis</i>   | 75.2        | 85.2        | 67.3        | 72.7        | 71.4        | 72.5        | 77.6        | 79.7        | 79.9        | 80.7        | 80.7         | 79.7        | 83.7        |
| <i>Neohydnius jiuzhaigouensis</i> | 76.8        | 84.6        | 69.4        | 73.2        | 73.1        | 74.5        | 78.5        | 80.8        | 80.7        | 81.1        | 81.7         | 81.4        | 85.5        |
| <i>Tenerus flavicollis</i>        | 75          | 85.2        | 67.3        | 70.5        | 72.7        | 72.5        | 77.6        | 79.5        | 78.7        | 80.8        | 82.4         | 80.8        | 83.3        |
| <i>Tenerus hilleri</i>            | 75.6        | 82.7        | 66.5        | 73.4        | 71.8        | 71.1        | 76.5        | 77.8        | 76.9        | 80.1        | 82.5         | 79.9        | 80.1        |
| <i>Tillus nitidus</i>             | 75.4        | 84.6        | 69.1        | 74.6        | 71.1        | 72.9        | 77.4        | 80.4        | 77.4        | 80.6        | 79.3         | 79.8        | 84.3        |
| <i>Cladiscus yunnanus</i>         | 77          | 87.2        | 68.8        | 73.5        | 73.5        | 74.3        | 77.4        | 80.6        | 77.7        | 80.9        | 83.5         | 80.9        | 85.5        |

**Table S5:** A+T% and A+T skew, C+G% and G+C skew in the 13 PCGs of mitogenomes in Cleridae.

| species/content                 | A+T% | A+T skew | C+G% | G+C skew |
|---------------------------------|------|----------|------|----------|
| <i>Clerus</i> sp.               | 78   | 0.017949 | 22   | -0.13636 |
| <i>Clerus dealbatus</i>         | 77.2 | 0.023316 | 22.8 | -0.15789 |
| <i>Xenorthrius discoidalis</i>  | 78.4 | -0.0051  | 21.6 | -0.12963 |
| <i>Opilo grahami</i>            | 78.4 | -0.0051  | 21.6 | -0.12963 |
| <i>Clerus klapperichi</i>       | 77.1 | 0.022049 | 22.9 | -0.15284 |
| <i>Omadius</i> sp.              | 74.3 | 0.033647 | 25.7 | -0.18677 |
| <i>Trichodes</i> sp.            | 76.7 | 0.014342 | 23.3 | -0.19313 |
| <i>Pieleus irregularis</i>      | 75.1 | -0.00133 | 24.9 | -0.18072 |
| <i>Callimerus chinensis</i>     | 76.9 | -0.01691 | 23.2 | -0.14655 |
| <i>Callimerus inbasalis</i>     | 77.4 | 0.005168 | 22.6 | -0.16814 |
| <i>Callimerus</i> sp.           | 77.8 | -0.00514 | 22.2 | -0.14414 |
| <i>Neohydus sinensis</i>        | 77.4 | -0.00775 | 22.6 | -0.15044 |
| <i>Callimerus nigroapicalis</i> | 76.3 | 0.006553 | 23.8 | -0.16807 |
| <i>Neohydus jiuzhaigouensis</i> | 77.6 | -0.00773 | 22.5 | -0.13778 |
| <i>Tenerus flavicollis</i>      | 76.3 | 0.030144 | 23.7 | -0.18987 |
| <i>Tenerus hilleri</i>          | 75.5 | 0.035762 | 24.5 | -0.22449 |
| <i>Tillus nitidus</i>           | 76.6 | 0.002611 | 23.5 | -0.18298 |
| <i>Cladiscus yunnanus</i>       | 77.3 | 0.001294 | 22.8 | -0.16667 |

**Table S6:** Codon usage of PCGs of mitogenomes in Cleridae.

| genes        | Start codon |     |     |     |     |     | Stop codon |     |    |
|--------------|-------------|-----|-----|-----|-----|-----|------------|-----|----|
|              | ATT         | ATA | ATG | ATC | TTG | GTG | TAG        | TAA | T- |
| <i>nad2</i>  | 14          | 3   |     |     |     |     | 2          | 15  |    |
| <i>cox1</i>  | 10          | 2   | 5   |     |     |     |            | 17  | 1  |
| <i>cox2</i>  | 6           | 6   | 3   | 2   |     | 1   |            | 9   | 9  |
| <i>atp8</i>  | 13          |     |     | 5   |     |     |            | 18  |    |
| <i>atp6</i>  |             | 18  |     |     |     |     |            | 18  |    |
| <i>cox3</i>  |             |     | 18  |     |     |     |            | 9   | 9  |
| <i>nad3</i>  | 7           | 11  |     |     |     |     | 6          | 12  |    |
| <i>nad5</i>  | 5           | 13  |     |     |     |     | 1          | 3   | 14 |
| <i>nad4</i>  | 2           | 15  | 1   |     |     |     |            |     | 18 |
| <i>nad4L</i> | 3           |     | 14  |     | 1   |     | 2          | 16  |    |
| <i>nad6</i>  | 14          | 2   |     | 2   |     |     |            | 18  |    |
| <i>cytb</i>  |             |     | 18  |     |     |     | 11         | 5   | 2  |
| <i>nad1</i>  | 2           |     |     |     | 16  |     | 17         | 1   |    |

**Table S7:** RSCU of the mitochondrial PCGs of Cleridae

|      | Clerinae |         | Hydnocerinae |      | Korynetinae |       | Tillinae |       | Average  |
|------|----------|---------|--------------|------|-------------|-------|----------|-------|----------|
| AA   | Codon    | RSCU    | Codon        | RSCU | Codon       | RSCU  | Codon    | RSCU  | RSCU     |
| Phe  | UUU      | 1.81125 | UUU          | 1.84 | UUU         | 1.79  | UUU      | 1.76  | 1.800313 |
| Phe  | UUC      | 0.18875 | UUC          | 0.16 | UUC         | 0.21  | UUC      | 0.24  | 0.199688 |
| Leu2 | UUA      | 4.76375 | UUA          | 4.92 | UUA         | 4.34  | UUA      | 4.6   | 4.655938 |
| Leu2 | UUG      | 0.3525  | UUG          | 0.25 | UUG         | 0.27  | UUG      | 0.28  | 0.288125 |
| Leu1 | CUU      | 0.43    | CUU          | 0.46 | CUU         | 0.705 | CUU      | 0.65  | 0.56125  |
| Leu1 | CUC      | 0.04125 | CUC          | 0.04 | CUC         | 0.125 | CUC      | 0.07  | 0.069063 |
| Leu1 | CUA      | 0.375   | CUA          | 0.31 | CUA         | 0.52  | CUA      | 0.385 | 0.3975   |
| Leu1 | CUG      | 0.03125 | CUG          | 0.02 | CUG         | 0.035 | CUG      | 0.02  | 0.026563 |
| Ile  | AUU      | 1.85625 | AUU          | 1.85 | AUU         | 1.81  | AUU      | 1.86  | 1.844063 |
| Ile  | AUC      | 0.14375 | AUC          | 0.16 | AUC         | 0.19  | AUC      | 0.14  | 0.158438 |
| Met  | AUA      | 1.82375 | AUA          | 1.84 | AUA         | 1.855 | AUA      | 1.855 | 1.843438 |
| Met  | AUG      | 0.17625 | AUG          | 0.16 | AUG         | 0.145 | AUG      | 0.145 | 0.156563 |
| Val  | GUU      | 1.9675  | GUU          | 1.93 | GUU         | 2.04  | GUU      | 1.83  | 1.941875 |
| Val  | GUC      | 0.17875 | GUC          | 0.15 | GUC         | 0.265 | GUC      | 0.13  | 0.180938 |
| Val  | GUA      | 1.685   | GUA          | 1.77 | GUA         | 1.52  | GUA      | 1.885 | 1.715    |
| Val  | GUG      | 0.165   | GUG          | 0.15 | GUG         | 0.18  | GUG      | 0.165 | 0.165    |
| Ser2 | UCU      | 3.07875 | UCU          | 2.92 | UCU         | 2.66  | UCU      | 2.68  | 2.834688 |
| Ser2 | UCC      | 0.2875  | UCC          | 0.27 | UCC         | 0.365 | UCC      | 0.395 | 0.329375 |
| Ser2 | UCA      | 1.80125 | UCA          | 2.1  | UCA         | 2.165 | UCA      | 1.99  | 2.014063 |
| Ser2 | UCG      | 0.08875 | UCG          | 0.1  | UCG         | 0.09  | UCG      | 0.11  | 0.097188 |
| Pro  | CCU      | 2.52875 | CCU          | 2.34 | CCU         | 2.07  | CCU      | 2.475 | 2.353438 |
| Pro  | CCC      | 0.34625 | CCC          | 0.4  | CCC         | 0.55  | CCC      | 0.335 | 0.407813 |
| Pro  | CCA      | 1.025   | CCA          | 1.17 | CCA         | 1.26  | CCA      | 1.11  | 1.14125  |
| Pro  | CCG      | 0.10125 | CCG          | 0.1  | CCG         | 0.12  | CCG      | 0.08  | 0.100313 |
| Thr  | ACU      | 1.91    | ACU          | 2.16 | ACU         | 2.075 | ACU      | 2.24  | 2.09625  |
| Thr  | ACC      | 0.43875 | ACC          | 0.3  | ACC         | 0.34  | ACC      | 0.31  | 0.347188 |
| Thr  | ACA      | 1.55625 | ACA          | 1.5  | ACA         | 1.56  | ACA      | 1.4   | 1.504063 |
| Thr  | ACG      | 0.095   | ACG          | 0.04 | ACG         | 0.025 | ACG      | 0.05  | 0.0525   |
| Ala  | GCU      | 2.18    | GCU          | 2.15 | GCU         | 2.52  | GCU      | 2.275 | 2.28125  |
| Ala  | GCC      | 0.47875 | GCC          | 0.41 | GCC         | 0.41  | GCC      | 0.435 | 0.433438 |
| Ala  | GCA      | 1.20375 | GCA          | 1.37 | GCA         | 1.055 | GCA      | 1.245 | 1.218438 |
| Ala  | GCG      | 0.13875 | GCG          | 0.08 | GCG         | 0.015 | GCG      | 0.045 | 0.920938 |
| Tyr  | UAU      | 1.80875 | UAU          | 1.79 | UAU         | 1.75  | UAU      | 1.74  | 1.772188 |
| Tyr  | UAC      | 0.19125 | UAC          | 0.21 | UAC         | 0.25  | UAC      | 0.26  | 0.227813 |
| His  | CAU      | 1.75875 | CAU          | 1.74 | CAU         | 1.5   | CAU      | 1.77  | 1.692188 |
| His  | CAC      | 0.24125 | CAC          | 0.27 | CAC         | 0.5   | CAC      | 0.23  | 0.310313 |
| Gln  | CAA      | 1.83625 | CAA          | 1.88 | CAA         | 1.795 | CAA      | 1.81  | 1.830313 |
| Gln  | CAG      | 0.16375 | CAG          | 0.12 | CAG         | 0.205 | CAG      | 0.19  | 0.169688 |
| Asn  | AAU      | 1.77375 | AAU          | 1.79 | AAU         | 1.725 | AAU      | 1.75  | 1.759688 |
| Asn  | AAC      | 0.22625 | AAC          | 0.21 | AAC         | 0.275 | AAC      | 0.25  | 0.240313 |
| Lys  | AAA      | 1.7375  | AAA          | 1.79 | AAA         | 1.785 | AAA      | 1.855 | 1.791875 |
| Lys  | AAG      | 0.2625  | AAG          | 0.21 | AAG         | 0.215 | AAG      | 0.145 | 0.208125 |
| Asp  | GAU      | 1.62375 | GAU          | 1.68 | GAU         | 1.71  | GAU      | 1.72  | 1.683438 |
| Asp  | GAC      | 0.37625 | GAC          | 0.32 | GAC         | 0.29  | GAC      | 0.28  | 0.316563 |
| Glu  | GAA      | 1.73375 | GAA          | 1.83 | GAA         | 1.705 | GAA      | 1.87  | 1.784688 |
| Glu  | GAG      | 0.26625 | GAG          | 0.18 | GAG         | 0.295 | GAG      | 0.13  | 0.217813 |

|      |     |         |     |      |     |       |     |       |          |
|------|-----|---------|-----|------|-----|-------|-----|-------|----------|
| Cys  | UGU | 1.6925  | UGU | 1.81 | UGU | 1.825 | UGU | 1.79  | 1.779375 |
| Cys  | UGC | 0.3075  | UGC | 0.19 | UGC | 0.175 | UGC | 0.21  | 0.220625 |
| Trp  | UGA | 1.82875 | UGA | 1.88 | UGA | 1.805 | UGA | 1.82  | 1.833438 |
| Trp  | UGG | 0.17125 | UGG | 0.12 | UGG | 0.195 | UGG | 0.18  | 0.166563 |
| Arg  | CGU | 1.37    | CGU | 1.32 | CGU | 1.305 | CGU | 1.425 | 1.355    |
| Arg  | CGC | 0.17    | CGC | 0.11 | CGC | 0.23  | CGC | 0.19  | 0.175    |
| Arg  | CGA | 2.2175  | CGA | 2.26 | CGA | 2.305 | CGA | 2.035 | 2.204375 |
| Arg  | CGG | 0.24    | CGG | 0.31 | CGG | 0.15  | CGG | 0.345 | 0.26125  |
| Ser1 | AGU | 0.51875 | AGU | 0.53 | AGU | 0.56  | AGU | 0.61  | 0.554688 |
| Ser1 | AGC | 0.10125 | AGC | 0.07 | AGC | 0.08  | AGC | 0.045 | 0.074063 |
| Ser1 | AGA | 2.0225  | AGA | 1.89 | AGA | 1.93  | AGA | 2.02  | 1.965625 |
| Ser1 | AGG | 0.09875 | AGG | 0.11 | AGG | 0.15  | AGG | 0.145 | 0.125938 |
| Gly  | GGU | 0.86    | GGU | 1.02 | GGU | 0.955 | GGU | 0.8   | 0.90875  |
| Gly  | GGC | 0.1875  | GGC | 0.16 | GGC | 0.14  | GGC | 0.15  | 0.159375 |
| Gly  | GGA | 2.05625 | GGA | 2.12 | GGA | 2.115 | GGA | 2.345 | 2.159063 |
| Gly  | GGG | 0.8925  | GGG | 0.7  | GGG | 0.79  | GGG | 0.7   | 0.770625 |

**Table S8:** Amino acid constituents among four subfamilies of Cleridae

| AA       | Clerinae | Hydnocerinae | Korynetinae | Tillinae | Average |
|----------|----------|--------------|-------------|----------|---------|
| Leu2(L2) | 489      | 499          | 437         | 475      | 475     |
| Ile(I)   | 398      | 402          | 417         | 409      | 406     |
| Phe(F)   | 355      | 374          | 363         | 360      | 363     |
| Met(M)   | 254      | 257          | 248         | 263      | 256     |
| Ser2(S2) | 214      | 233          | 231         | 233      | 228     |
| Asn(N)   | 207      | 209          | 210         | 206      | 208     |
| Gly(G)   | 187      | 194          | 203         | 197      | 195     |
| Tyr(Y)   | 186      | 175          | 171         | 176      | 177     |
| Thr(T)   | 154      | 156          | 169         | 159      | 159     |
| Val(V)   | 159      | 156          | 167         | 157      | 160     |
| Ala(A)   | 147      | 152          | 142         | 138      | 145     |
| Ser1(S1) | 112      | 113          | 119         | 127      | 117     |
| Pro(P)   | 130      | 132          | 132         | 126      | 130     |
| Lys(K)   | 115      | 114          | 112         | 115      | 114     |
| Leu1(L1) | 85       | 80           | 131         | 110      | 101     |
| Trp(W)   | 93       | 94           | 97          | 96       | 95      |
| Glu(E)   | 77       | 76           | 74          | 77       | 76      |
| His(H)   | 68       | 71           | 68          | 69       | 69      |
| Asp(D)   | 64       | 64           | 66          | 65       | 64      |
| Gln(Q)   | 64       | 61           | 64          | 63       | 63      |
| Arg(R)   | 51       | 52           | 52          | 52       | 52      |
| Cys(C)   | 31       | 33           | 34          | 31       | 32      |
